# Supplementary material for: Sex difference in evolution of cognitive decline: studies on mouse model and the Dominantly Inherited Alzheimer Network cohort
Source: PubMed Central journal article supplement (PMC10097702; doi:10.1038/s41398-023-02411-8), 2023-04-12
Supplement: 41398_2023_2411_MOESM9_ESM.pdf [file 41398_2023_2411_MOESM9_ESM.pdf]

## DIAN Consortia Author List

| <b>LastName</b> | <b>First</b>   | <b>Affiliation</b>                                                | <b>Email address</b>                                                                   |
|-----------------|----------------|-------------------------------------------------------------------|----------------------------------------------------------------------------------------|
| Adams           | Sarah          | Washington University in St. Louis School of Medicine             | <a href="mailto:sladams@wustl.edu">sladams@wustl.edu</a>                               |
| Allegri         | Ricardo        | Institute of Neurological Research Fleni, Buenos Aires, Argentina | <a href="mailto:rallengri@fleni.org.ar">rallengri@fleni.org.ar</a>                     |
| Araki           | Aki            | Niigata University                                                | <a href="mailto:araki-aki@bri.niigata-u.ac.jp">araki-aki@bri.niigata-u.ac.jp</a>       |
| Barthelemy      | Nicolas        | Washington University in St. Louis School of Medicine             | <a href="mailto:barthelemy.nicolas@wustl.edu">barthelemy.nicolas@wustl.edu</a>         |
| Bateman         | Randall        | Washington University in St. Louis School of Medicine             | <a href="mailto:batemanr@wustl.edu">batemanr@wustl.edu</a>                             |
| Bechara         | Jacob          | Neuroscience Research Australia                                   | <a href="mailto:j.bechara@neura.edu.au">j.bechara@neura.edu.au</a>                     |
| Benzinger       | Tammie         | Washington University in St. Louis School of Medicine             | <a href="mailto:benzingert@wustl.edu">benzingert@wustl.edu</a>                         |
| Berman          | Sarah          | University of Pittsburgh                                          | <a href="mailto:bermans@upmc.edu">bermans@upmc.edu</a>                                 |
| Bodge           | Courtney       | Brown University-Butler Hospital                                  | <a href="mailto:Cbodge@Butler.org">Cbodge@Butler.org</a>                               |
| Brandon         | Susan          | Washington University in St. Louis School of Medicine             | <a href="mailto:brandons@wustl.edu">brandons@wustl.edu</a>                             |
| Brooks          | William (Bill) | Neuroscience Research Australia                                   | <a href="mailto:w.brooks@NeuRA.edu.au">w.brooks@NeuRA.edu.au</a>                       |
| Brosch          | Jared          | Indiana University                                                |                                                                                        |
| Buck            | Jill           | Indiana University                                                | <a href="mailto:jilmbuck@iu.edu">jilmbuck@iu.edu</a>                                   |
| Buckles         | Virginia       | Washington University in St. Louis School of Medicine             | <a href="mailto:bucklesv@wustl.edu">bucklesv@wustl.edu</a>                             |
| Carter          | Kathleen       | Emory University School of Medicine                               | <a href="mailto:emma.kathleen.carter@emory.edu">emma.kathleen.carter@emory.edu</a>     |
| Cash            | Lisa           | Washington University in St. Louis School of Medicine             | <a href="mailto:cashl@wustl.edu">cashl@wustl.edu</a>                                   |
| Chen            | Charlie        | Washington University in St. Louis School of Medicine             | <a href="mailto:chenc@wustl.edu">chenc@wustl.edu</a>                                   |
| Chhatwal        | Jasmeer        | Brigham and Women's Hospital–Massachusetts General Hospital       | <a href="mailto:Chhatwal.Jasmeer@mgh.harvard.edu">Chhatwal.Jasmeer@mgh.harvard.edu</a> |
| Chrem           | Patricio       | Institute of Neurological Research Fleni, Buenos Aires, Argentina | <a href="mailto:pchremmendez@fleni.org.ar">pchremmendez@fleni.org.ar</a>               |
| Chua            | Jasmin         | Washington University in St. Louis School of Medicine             | <a href="mailto:chuaik@wustl.edu">chuaik@wustl.edu</a>                                 |
| Chui            | Helena         | University of Southern California                                 | <a href="mailto:helena.chui@med.usc.edu">helena.chui@med.usc.edu</a>                   |
| Cruchaga        | Carlos         | Washington University in St. Louis School of Medicine             | <a href="mailto:cruchagac@wustl.edu">cruchagac@wustl.edu</a>                           |
| Day             | Gregory S      | Mayo Clinic Jacksonville                                          | <a href="mailto:Day.gregory@mayo.edu">Day.gregory@mayo.edu</a>                         |
| De La Cruz      | Chrismary      | Columbia University                                               |                                                                                        |
| Denner          | Darcy          | Washington University in St. Louis School of Medicine             | <a href="mailto:drdenner@wustl.edu">drdenner@wustl.edu</a>                             |

|               |            |                                                                   |                                                                                  |
|---------------|------------|-------------------------------------------------------------------|----------------------------------------------------------------------------------|
| Diffenbacher  | Anna       | German Center for Neurodegenerative Diseases (DZNE) Munich        | <a href="mailto:Anna.dieffenbacher@dzne.de">Anna.dieffenbacher@dzne.de</a>       |
| Dincer        | Aylin      | Washington University in St. Louis School of Medicine             | <a href="mailto:aylin.dincer@wustl.edu">aylin.dincer@wustl.edu</a>               |
| Donahue       | Tamara     | Washington University in St. Louis School of Medicine             | <a href="mailto:tammie@wustl.edu">tammie@wustl.edu</a>                           |
| Douglas       | Jane       | University College London                                         | <a href="mailto:jane.douglas@ucl.ac.uk">jane.douglas@ucl.ac.uk</a>               |
| Duong         | Duc        | Emory University School of Medicine                               | <a href="mailto:dduong@emory.edu">dduong@emory.edu</a>                           |
| Egido         | Noelia     | Institute of Neurological Research Fleni, Buenos Aires, Argentina | <a href="mailto:negido@fleni.org.ar">negido@fleni.org.ar</a>                     |
| Esposito      | Bianca     | Icahn School of Medicine at Mount Sinai                           | <a href="mailto:bianca.esposito@mssm.edu">bianca.esposito@mssm.edu</a>           |
| Fagan         | Anne       | Washington University in St. Louis School of Medicine             | <a href="mailto:fanana@wustl.edu">fanana@wustl.edu</a>                           |
| Farlow        | Marty      | Indiana University                                                | <a href="mailto:mfarlow@iupui.edu">mfarlow@iupui.edu</a>                         |
| Feldman       | Becca      | Washington University in St. Louis School of Medicine             | <a href="mailto:rebeccaf@wustl.edu">rebeccaf@wustl.edu</a>                       |
| Fitzpatrick   | Colleen    | Brigham and Women's Hospital-Massachusetts                        | <a href="mailto:cdfitzpatrick@bwh.harvard.edu">cdfitzpatrick@bwh.harvard.edu</a> |
| Flores        | Shaney     | Washington University in St. Louis School of Medicine             | <a href="mailto:sflores@wustl.edu">sflores@wustl.edu</a>                         |
| Fox           | Nick       | University College London                                         | <a href="mailto:n.fox@ucl.ac.uk">n.fox@ucl.ac.uk</a>                             |
| Franklin      | Erin       | Washington University in St. Louis School of Medicine             | <a href="mailto:efranklin@wustl.edu">efranklin@wustl.edu</a>                     |
| Friedrichsen  | Nelly      | Washington University in St. Louis School of Medicine             | <a href="mailto:n.joseph@wustl.edu">n.joseph@wustl.edu</a>                       |
| Fujii         | Hisako     | Osaka City University                                             | <a href="mailto:hfuji@med.osaka-cu.ac.jp">hfujii@med.osaka-cu.ac.jp</a>          |
| Gardener      | Samantha   | Edith Cowan University, Perth                                     | <a href="mailto:s.gardener@ecu.edu.au">s.gardener@ecu.edu.au</a>                 |
| Ghetti        | Bernardino | Indiana University                                                | <a href="mailto:bghetti@iupui.edu">bghetti@iupui.edu</a>                         |
| Goate         | Alison     | Icahn School of Medicine at Mount Sinai                           | <a href="mailto:alison.goate@mssm.edu">alison.goate@mssm.edu</a>                 |
| Goldberg      | Sarah      | University of Pittsburgh                                          | goldbergs2@upmc.edu                                                              |
| Goldman       | Jill       | Columbia University                                               | <a href="mailto:JG2673@cumc.columbia.edu">JG2673@cumc.columbia.edu</a>           |
| Gonzalez      | Alyssa     | Washington University in St. Louis School of Medicine             | <a href="mailto:alyssa.gonzales@wustl.edu">alyssa.gonzales@wustl.edu</a>         |
| Gordon        | Brian      | Washington University in St. Louis School of Medicine             | <a href="mailto:bagordon@wustl.edu">bagordon@wustl.edu</a>                       |
| Gräber-Sultan | Susanne    | DZNE-Tübingen                                                     | susanne.graeber-sultan@dzne.de<br>@dzne.de                                       |
| Graff-Radford | Neill      | Mayo Clinic Jacksonville                                          | <a href="mailto:grafradford.neill@mayo.edu">grafradford.neill@mayo.edu</a>       |
| Graham        | Morgan     | Mayo Clinic Jacksonville                                          | <a href="mailto:Graham.Morgan@mayo.edu">Graham.Morgan@mayo.edu</a>               |
| Gray          | Julia      | Washington University in St. Louis School of Medicine             | <a href="mailto:gray@wustl.edu">gray@wustl.edu</a>                               |

|                 |                |                                                               |                                                                                                            |
|-----------------|----------------|---------------------------------------------------------------|------------------------------------------------------------------------------------------------------------|
| Gremminger      | Emily          | Washington University in St. Louis School of Medicine         | <a href="mailto:egremminger@wustl.edu">egremminger@wustl.edu</a>                                           |
| Grilo           | Miguel         | University College London                                     | <a href="mailto:m.grilo@ucl.ac.uk">m.grilo@ucl.ac.uk</a>                                                   |
| Groves          | Alex           | Washington University in St. Louis School of Medicine         | <a href="mailto:amgroves@wustl.edu">amgroves@wustl.edu</a>                                                 |
| Haass           | Christian      | Ludwig-Maximilians University - Munich                        | <a href="mailto:Christian.Haass@mail03.med.uni-muenchen.de">Christian.Haass@mail03.med.uni-muenchen.de</a> |
| Häsler          | Lisa           | German Center for Neurodegenerative Diseases (DZNE), Tübingen | <a href="mailto:Lisa.Haesler@dzne.de">Lisa.Haesler@dzne.de</a>                                             |
| Hassenstab      | Jason          | Washington University in St. Louis School of Medicine         | <a href="mailto:hassenstabi@wustl.edu">hassenstabi@wustl.edu</a>                                           |
| Hellm           | Cortaiga       | Washington University in St. Louis School of Medicine         | <a href="mailto:cortaiga.hellm@wustl.edu">cortaiga.hellm@wustl.edu</a>                                     |
| Herries         | Elizabeth      | Washington University in St. Louis School of Medicine         | <a href="mailto:e.herries@wustl.edu">e.herries@wustl.edu</a>                                               |
| Hoechst-Swisher | Laura          | Washington University in St. Louis School of Medicine         | <a href="mailto:goodl@wustl.edu">goodl@wustl.edu</a>                                                       |
| Hofmann         | Anna           | German Center for Neurodegenerative Diseases (DZNE), Tübingen | <a href="mailto:Anna.Hofmann@med.uni-tuebingen.de">Anna.Hofmann@med.uni-tuebingen.de</a>                   |
| Holtzman        | David          | Washington University in St. Louis School of Medicine         | <a href="mailto:holtzman@wustl.edu">holtzman@wustl.edu</a>                                                 |
| Hornbeck        | Russ           | Washington University in St. Louis School of Medicine         | <a href="mailto:russ@wustl.edu">russ@wustl.edu</a>                                                         |
| Igor            | Yakushev       | German Center for Neurodegenerative Diseases (DZNE) Munich    | <a href="mailto:Igor.yakushev@tum.de">Igor.yakushev@tum.de</a>                                             |
| Ihara           | Ryoko          | Tokyo University                                              | <a href="mailto:ihara-ky@umin.ac.jp">ihara-ky@umin.ac.jp</a>                                               |
| Ikeuchi         | Takeshi        | Niigata University                                            | <a href="mailto:ikeuchi@bri.niigata-u.ac.jp">ikeuchi@bri.niigata-u.ac.jp</a>                               |
| Ikonomovic      | Snezana        | University of Pittsburgh                                      | <a href="mailto:ikonmovics@upmc.edu">ikonmovics@upmc.edu</a>                                               |
| Ishii           | Kenji          | Niigata University/Tokyo University                           | <a href="mailto:ishii@pet.tmig.or.jp">ishii@pet.tmig.or.jp</a>                                             |
| Jack            | Clifford       | Mayo Clinic Rochester                                         | <a href="mailto:jack.clifford@mayo.edu">jack.clifford@mayo.edu</a>                                         |
| Jerome          | Gina           | Washington University in St. Louis School of Medicine         | <a href="mailto:ginajerome@wustl.edu">ginajerome@wustl.edu</a>                                             |
| Johnson         | Erik           | Emory University School of Medicine                           | <a href="mailto:erik.johnson@emory.edu">erik.johnson@emory.edu</a>                                         |
| Jucker          | Mathias        | German Center for Neurodegenerative Diseases (DZNE), Tübingen | <a href="mailto:mathias.jucker@uni-tuebingen.de">mathias.jucker@uni-tuebingen.de</a>                       |
| Karch           | Celeste        | Washington University in St. Louis School of Medicine         | <a href="mailto:karchc@wustl.edu">karchc@wustl.edu</a>                                                     |
| Käser           | Stephan        | German Center for Neurodegenerative Diseases (DZNE), Tübingen | <a href="mailto:Stephan.kaeser@uni-tuebingen.de">Stephan.kaeser@uni-tuebingen.de</a>                       |
| Kasuga          | Kensaku        | Niigata University                                            | <a href="mailto:ken39@bri.niigata-u.ac.jp">ken39@bri.niigata-u.ac.jp</a>                                   |
| Keefe           | Sarah          | Washington University in St. Louis School of Medicine         | <a href="mailto:sarahkeefe@wustl.edu">sarahkeefe@wustl.edu</a>                                             |
| Klunk           | William (Bill) | University of Pittsburgh                                      | <a href="mailto:klunkwe@gmail.com">klunkwe@gmail.com</a>                                                   |

|                   |            |                                                               |                                                                                                |
|-------------------|------------|---------------------------------------------------------------|------------------------------------------------------------------------------------------------|
| Koeppe            | Robert     | University of Michigan                                        | <a href="mailto:koeppe@umich.edu">koeppe@umich.edu</a>                                         |
| Koudelis          | Deb        | Washington University in St. Louis School of Medicine         | <a href="mailto:delanod@wustl.edu">delanod@wustl.edu</a>                                       |
| Kuder-Buletta     | Elke       | German Center for Neurodegenerative Diseases (DZNE), Tübingen | <a href="mailto:elke.kuder-buletta@dzne.de">elke.kuder-buletta@dzne.de</a>                     |
| Laske             | Christoph  | German Center for Neurodegenerative Diseases (DZNE), Tübingen | <a href="mailto:christoph.laske@med.uni-tuebingen.de">christoph.laske@med.uni-tuebingen.de</a> |
| Levey             | Allan      | Emory University School of Medicine                           | <a href="mailto:alevey@emory.edu">alevey@emory.edu</a>                                         |
| Levin             | Johannes   | German Center for Neurodegenerative Diseases (DZNE) Munich    | <a href="mailto:Johannes.Levin@med.uni-muenchen.de">Johannes.Levin@med.uni-muenchen.de</a>     |
| Li                | Yan        | Washington University in St. Louis School of Medicine         | <a href="mailto:yanli833@wustl.edu">yanli833@wustl.edu</a>                                     |
| Lopez             | Oscar      | University of Pittsburgh                                      | <a href="mailto:lopezol@upmc.edu">lopezol@upmc.edu</a>                                         |
| Marsh             | Jacob      | Washington University in St. Louis School of Medicine         | <a href="mailto:jacobmarsh@wustl.edu">jacobmarsh@wustl.edu</a>                                 |
| Martinez          | Rita       | Washington University in St. Louis School of Medicine         | <a href="mailto:Ritamartinez@wustl.edu">Ritamartinez@wustl.edu</a>                             |
| Martins           | Ralph      | Edith Cowan University                                        | <a href="mailto:r.martins@ecu.edu.au">r.martins@ecu.edu.au</a>                                 |
| Mason             | Neal Scott | University of Pittsburgh Medical Center                       | <a href="mailto:masonss@upmc.edu">masonss@upmc.edu</a>                                         |
| Masters           | Colin      | University of Melbourne                                       | <a href="mailto:c.masters@unimelb.edu.au">c.masters@unimelb.edu.au</a>                         |
| Mawuenyega        | Kwasi      | Washington University in St. Louis School of Medicine         | <a href="mailto:_mawuenyegak@wustl.edu">_mawuenyegak@wustl.edu</a>                             |
| McCullough        | Austin     | Washington University in St. Louis School of Medicine         | <a href="mailto:amccullough@wustl.edu">amccullough@wustl.edu</a>                               |
| McDade            | Eric       | Washington University in St. Louis School of Medicine         | <a href="mailto:ericmcdade@wustl.edu">ericmcdade@wustl.edu</a>                                 |
| Mejia             | Arlene     | Columbia University                                           | <a href="mailto:am4717@cumc.columbia.edu">am4717@cumc.columbia.edu</a>                         |
| Morenas-Rodriguez | Estrella   | Ludwig-Maximilians University, Munich                         | <a href="mailto:Estrella.Morenas-Rodriguez@dzne.d">Estrella.Morenas-Rodriguez@dzne.d</a>       |
| Morris            | John       | Washington University in St. Louis School of Medicine         | <a href="mailto:jcmorris@wustl.edu">jcmorris@wustl.edu</a>                                     |
| MountzMD          | James      | University of Pittsburgh                                      | <a href="mailto:mountzjm@upmc.edu">mountzjm@upmc.edu</a>                                       |
| Mummery           | Cath       | University College London                                     | <a href="mailto:c.mummery@ucl.ac.uk">c.mummery@ucl.ac.uk</a>                                   |
| Nadkarni          | Neelesh    | University of Pittsburgh                                      | <a href="mailto:nadkarnink@upmc.edu">nadkarnink@upmc.edu</a>                                   |
| Nagamatsu         | Akemi      | Tokyo University                                              | <a href="mailto:mail:akm77-tky@umin.ac.jp">mail:akm77-tky@umin.ac.jp</a>                       |
| Neimeyer          | Katie      | Columbia University                                           | <a href="mailto:kn2416@cumc.columbia.edu">kn2416@cumc.columbia.edu</a>                         |
| Niimi             | Yoshiki    | Tokyo University                                              | <a href="mailto:niimiy-crc@h.u-tokyo.ac.jp">niimiy-crc@h.u-tokyo.ac.jp</a>                     |
| Noble             | James      | Columbia University                                           | <a href="mailto:jn2054@columbia.edu">jn2054@columbia.edu</a>                                   |
| Norton            | Joanne     | Washington University in St. Louis School of Medicine         | <a href="mailto:nortonj@wustl.edu">nortonj@wustl.edu</a>                                       |

|            |            |                                                               |                                                                                                              |
|------------|------------|---------------------------------------------------------------|--------------------------------------------------------------------------------------------------------------|
| Nuscher    | Brigitte   | Ludwig-Maximilians University, Munich                         | <a href="mailto:Brigitte.Nuscher@mail03.med.uni-muenchen.de">Brigitte.Nuscher@mail03.med.uni-muenchen.de</a> |
| O'Connor   | Antoinette | University College London                                     | antoinette.o'connor@ucl.ac.uk                                                                                |
| Obermüller | Ulricke    | Hertie Institute for Clinical Brain Research                  | ulrike.obermueller@klinikum.uni-tuebingen.de                                                                 |
| Patira     | Riddhi     | University of Pittsburgh                                      | patirar@upmc.edu                                                                                             |
| Perrin     | Richard    | Washington University in St. Louis School of Medicine         | <a href="mailto:rperrin@wustl.edu">rperrin@wustl.edu</a>                                                     |
| Ping       | Lingyan    | Emory University School of Medicine                           | <a href="mailto:lingyan.ping@emory.edu">lingyan.ping@emory.edu</a>                                           |
| Preisiche  | Oliver     | German Center for Neurodegenerative Diseases (DZNE), Tübingen | Oliver.Preisiche@med.uni-tuebingen.de                                                                        |
| Renton     | Alan       | Icahn School of Medicine at Mount Sinai                       | <a href="mailto:alan.renton@mssm.edu">alan.renton@mssm.edu</a>                                               |
| Ringman    | John       | University of Southern California                             | <a href="mailto:john.ringman@med.usc.edu">john.ringman@med.usc.edu</a>                                       |
| Salloway   | Stephen    | Brown University-Butler Hospital                              | <a href="mailto:SSalloway@Butler.org">SSalloway@Butler.org</a>                                               |
| Schofield  | Peter      | Neuroscience Research Australia                               | <a href="mailto:p.schofield@neura.edu.au">p.schofield@neura.edu.au</a>                                       |
| Senda      | Michio     | Osaka City University                                         | <a href="mailto:michio_senda@kcho.jp">michio_senda@kcho.jp</a>                                               |
| Seyfried   | Nick       | Emory University School of Medicine                           | <a href="mailto:nseyfri@emory.edu">nseyfri@emory.edu</a>                                                     |
| Shady      | Kristine   | Washington University in St. Louis School of Medicine         | <a href="mailto:kesh238@g.uky.edu">kesh238@g.uky.edu</a>                                                     |
| Shimada    | Hiroyuki   | Osaka City University                                         | <a href="mailto:h.shimada@med.osaka-cu.ac.jp">h.shimada@med.osaka-cu.ac.jp</a>                               |
| Sigurdson  | Wendy      | Washington University in St. Louis School of Medicine         | <a href="mailto:sigurdsonw@wustl.edu">sigurdsonw@wustl.edu</a>                                               |
| Smith      | Jennifer   | Washington University in St. Louis School of Medicine         | <a href="mailto:smith.jennifer@wustl.edu">smith.jennifer@wustl.edu</a>                                       |
| Smith      | Lori       | University of Pittsburgh                                      | macedonials@upmc.edu                                                                                         |
| Snitz      | Beth       | University of Pittsburgh                                      | snitbe@upmc.edu                                                                                              |
| Sohrabi    | Hamid      | Edith Cowan University                                        | <a href="mailto:h.sohrabi@ecu.edu.au">h.sohrabi@ecu.edu.au</a>                                               |
| Stephens   | Sochenda   | Mayo Clinic Jacksonville                                      | <a href="mailto:Stephens.Sochenda@mayo.edu">Stephens.Sochenda@mayo.edu</a>                                   |
| Taddei     | Kevin      | Edith Cowan University                                        | <a href="mailto:k.taddei@ecu.edu.au">k.taddei@ecu.edu.au</a>                                                 |
| Thompson   | Sarah      | University of Pittsburgh                                      | thompsons24@upmc.edu                                                                                         |
| Vöglein    | Jonathan   | German Center for Neurodegenerative Diseases (DZNE) Munich    | <a href="mailto:Jonathan.voeglein@med.uni-muenchen.de">Jonathan.voeglein@med.uni-muenchen.de</a>             |
| Wang       | Peter      | Washington University in St. Louis School of Medicine         | <a href="mailto:guoqiao@wustl.edu">guoqiao@wustl.edu</a>                                                     |

|        |          |                                                       |                                                              |
|--------|----------|-------------------------------------------------------|--------------------------------------------------------------|
| Wang   | Qing     | Washington University in St. Louis School of Medicine | <a href="mailto:wangqing@wustl.edu">wangqing@wustl.edu</a>   |
| Weamer | Elise    | University of Pittsburgh                              | <a href="mailto:weamerea@upmc.edu">weamerea@upmc.edu</a>     |
| Xiong  | Chengjie | Washington University in St. Louis School of Medicine | <a href="mailto:chengjie@wustl.edu">chengjie@wustl.edu</a>   |
| Xu     | Jinbin   | Washington University in St. Louis School of Medicine | <a href="mailto:_jinbinxu@wustl.edu">_jinbinxu@wustl.edu</a> |
| Xu     | Xiong    | Washington University in St. Louis School of Medicine | <a href="mailto:xxu@wustl.edu">xxu@wustl.edu</a>             |
